# Supplementary material for: Cloning and Molecular Characterization of Hsp Genes from Anoplophora glabripennis and Their Responses to Cold Stress
Source: MDPI journal article supplement (doi:10.3390/ijms231911958), 2022-10-08
Supplement: s1 [file s1]

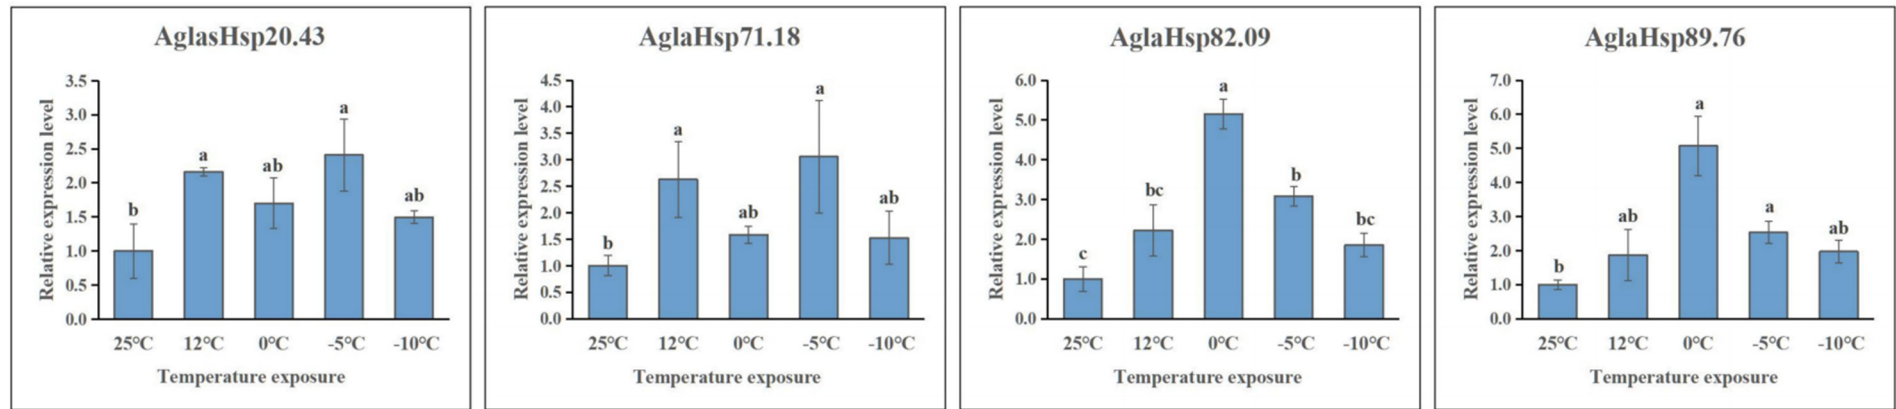

**Figure S2** Expression profiles of *AglaHsp* genes under different low temperature treatments for 6 h. Gene expression at 25°C was used as control, and relative expression levels are expressed as means  $\pm$  standard error of mean (SEM). Lowercase letters above the error bar indicate significant differences ( $P < 0.05$ , LSD)
