# Supplementary material for: Cloning and Molecular Characterization of Hsp Genes from Anoplophora glabripennis and Their Responses to Cold Stress
Source: Int J Mol Sci. 2022 Oct 8;23(19):11958. doi: 10.3390/ijms231911958 (PMC9570420; doi:10.3390/ijms231911958)
Supplement: Supplementary file 1 [file ijms-23-11958-s001.zip]

Archive with 4 entries (4 files):
- Figure S1 The coding sequences and their deduced amino acid sequences for AglaHsp20.43, AglaHsp71.18, AglaHsp82.09, and AglaHsp89.76.pdf
- Figure S2 Expression profiles of AglaHsp genes under different low temperature treatments for 6 h.pdf
- Table S1 The primer sequences used in this study.xlsx
- Table S2 PCR amplification conditions.xlsx
