# Supplementary material for: Cloning and Molecular Characterization of Hsp Genes from Anoplophora glabripennis and Their Responses to Cold Stress
Source: Int J Mol Sci. 2022 Oct 8;23(19):11958. doi: 10.3390/ijms231911958 (PMC9570420; doi:10.3390/ijms231911958)
Supplement: Supplementary file 1 [file ijms-23-11958-s001.zip › Table S1 The primer sequences used in this study.xlsx]

## Sheet: Table S1
Table S1. The primer sequences used in this study
Gene ID	Primer Sequences 5′→3′	Use	Restriction enzyme sites	Note
AglaHsp20.43-F	ATGTCTCTTCTGCCGTATTTGTTAG	Amplification of ORF	___	___
AglaHsp20.43-R	TTACTTTTTATCTCCTGCTTTTGGTTGT
AglaHsp71.18-F	ATGGTTGCAGTTGGTATCGA	Amplification of ORF
AglaHsp71.18-R	TTAGTCTACTTCTTCTATCGTTGGC
AglaHsp82.09-F	ATGCCTGAAGAAAACCAAAATG	Amplification of ORF
AglaHsp82.09-R	TTAATCAACTTCTTCCATGCGGG
AglaHsp89.76-F	ATGAAGCAGTACATATTTTTATTC	Amplification of ORF
AglaHsp89.76-R	TTACAGTTCGTCATGCTCTTCGTCTCTC
AglaHsp20.43-F	CCGGAATTCATGTCTCTTCTGCCGTATTTGTTAG	Amplification for prokaryotic expression	EcoRI	Underline sequences are the restriction enzyme sites
AglaHsp20.43-R	GCCCTCGAGCTTTTTATCTCCTGCTTTTGGTTGT		XhoI
AglaHsp71.18-F	GGATCCATGGTTGCAGTTGGTATCGA	Amplification for prokaryotic expression	BamHI
AglaHsp71.18-R	GAGCTCTTAGTCTACTTCTTCTATCGTTGGC		SacI
AglaHsp82.09-F	GGATCCATGCCTGAAGAAAACCAAAATG	Amplification for prokaryotic expression	BamHI
AglaHsp82.09-R	GAGCTCTTAATCAACTTCTTCCATGCGGG		SacI
AglaHsp89.76-F	CATGCCATGGCTAGTGAAGCTGGGGGATCAGAAAAT	Amplification for prokaryotic expression	NcoI
AglaHsp89.76-R	CCGGAGCTCATCAGTTCGTCATGCTCTTCGTCTCTC		SacI
