# Supplementary material for: Cloning and Molecular Characterization of Hsp Genes from Anoplophora glabripennis and Their Responses to Cold Stress
Source: Int J Mol Sci. 2022 Oct 8;23(19):11958. doi: 10.3390/ijms231911958 (PMC9570420; doi:10.3390/ijms231911958)
Supplement: Supplementary file 1 [file ijms-23-11958-s001.zip › Table S2 PCR amplification conditions.xlsx]

## Sheet: Table S2
Table S2. PCR amplification conditions
Gene	Temperature	Time	Cycle
AglaHsp20.43	98℃	10s	35
	55 ℃	5s
	72 ℃	5s
	4℃	Store
AglaHsp71.18	98℃	10s	35
	60 ℃	5s
	72 ℃	5s
	4℃	Store
AglaHsp82.09	98℃	10s	35
	55 ℃	5s
	72 ℃	15s
	4℃	Store
Hsp89.76	98℃	10s	35
	60 ℃	5s
	72 ℃	5s
	4℃	Store
